# Supplementary material for: PRINS Non-Coding RNA Regulates Nucleic Acid-Induced Innate Immune Responses of Human Keratinocytes
Source: PubMed Central journal article supplement (PMC5581800; doi:10.3389/fimmu.2017.01053), 2017-08-29

**Supplementary Table 1. List of primers and probes used for real-time RT-PCR.**

|                                                      |               |                               |                             | Probe no.     |
|------------------------------------------------------|---------------|-------------------------------|-----------------------------|---------------|
| Roche<br>Diagnostics -<br>Universal Probe<br>Library | 18S rRNS      | Forward                       | CGC TCC ACC AAC TAA GAA CG  | 77            |
|                                                      |               | Reverse                       | CTC AAC ACG GGA AAC CTC AC  |               |
|                                                      |               |                               |                             |               |
|                                                      | TNF- $\alpha$ | Forward                       | CAG CCT CTT CTC CTT CCT GAT | 29            |
|                                                      |               | Reverse                       | GCC AGA GGG CTG ATT AGA GA  |               |
|                                                      |               |                               |                             |               |
|                                                      | IL-1 $\alpha$ | Forward                       | GGT TGA GTT TAA GCC AAT CCA | 6             |
|                                                      |               | Reverse                       | TGC TGA CCT AGG CTT GAT GA  |               |
|                                                      |               |                               |                             |               |
|                                                      | IL-1 $\beta$  | Forward                       | AAA GCT TGG TGA TGT CTG GTC | 10            |
| Reverse                                              |               | AAA GGA CAT GGA GAA CAC CAC T |                             |               |
|                                                      |               |                               |                             |               |
| IL-6                                                 | Forward       | CAG GAG CCC AGC TAT GAA CT    | 45                          |               |
|                                                      | Reverse       | GAA GGC AGC AGG CAA CAC       |                             |               |
|                                                      |               |                               |                             |               |
| CCL5                                                 | Forward       | TGCCCACATCAAGGAGTATTT         | 59                          |               |
|                                                      | Reverse       | CTTTCGGGTGACAAAGACG           |                             |               |
|                                                      |               |                               |                             |               |
| Thermo Fischer<br>Scientific                         | IL-8          | TaqMan Gene Expression Assays |                             | Hs00174103_m1 |
|                                                      | PRINS         | TaqMan Gene Expression Assays |                             | Hs03671803_s1 |

**Supplementary figure 1. The evaluation of the effectiveness of PRINS overexpression by real-time RT-PCR.** NHEKs were transfected with a pcDNA3.1(+) vector containing the PRINS cDNA, while the empty pcDNA3.1(+) vector was used as control.

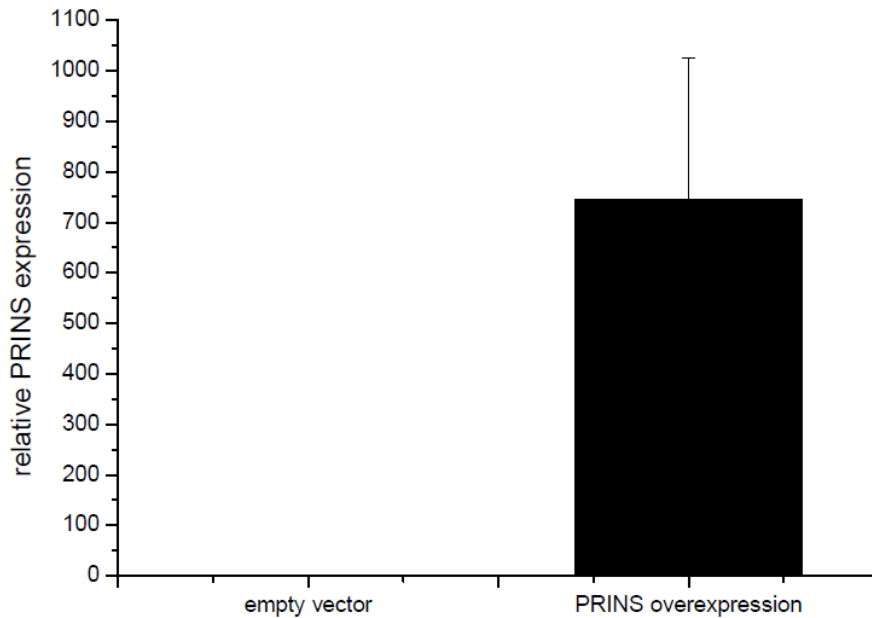

**Supplementary figure 2. Curve fit formula used to calculate binding affinities of PRINS and IL-6 based on initial fluorescence.**

**1:1 binding model:**

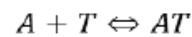

$$F(c_T) = F_u + (F_b - F_u) * \frac{c_{AT}}{c_A}$$

$$\frac{c_{AT}}{c_A} = \text{fraction bound} = \frac{1}{2c_A} * (c_T + c_A + K_d - \sqrt{(c_T + c_A + K_d)^2 - 4c_Tc_A})$$

- F<sub>u</sub>** fluorescence in unbound state
- F<sub>b</sub>** fluorescence in bound state
- K<sub>d</sub>** dissociation constant, to be determined
- c<sub>AT</sub>** concentration of formed complex
- c<sub>A</sub>** constant concentration of molecule A (fluorescent), known
- c<sub>T</sub>** concentration of molecule T in serial dilution

**Supplementary figure 3. Overexpression of PRINS regulates the expression and secretion of CCL-5.**

In parallel to priming with 5 ng/ml TNF- $\alpha$  and IFN- $\gamma$ , NHEKs were transfected with a pcDNA3.1(+) vector containing the PRINS cDNA; an empty pcDNA3.1(+) vector was used as control. After 24 hours, cells were transfected with poly(dA:dT). RNA expression of CCL-5 was detected by real-time RT-PCR, secretion of CCL-5 was measured by ELISA from cell supernatants. Data are presented as mean  $\pm$  SE of four independent experiments. \*  $p \leq 0.05$ ; \*\*  $p \leq 0.01$ .

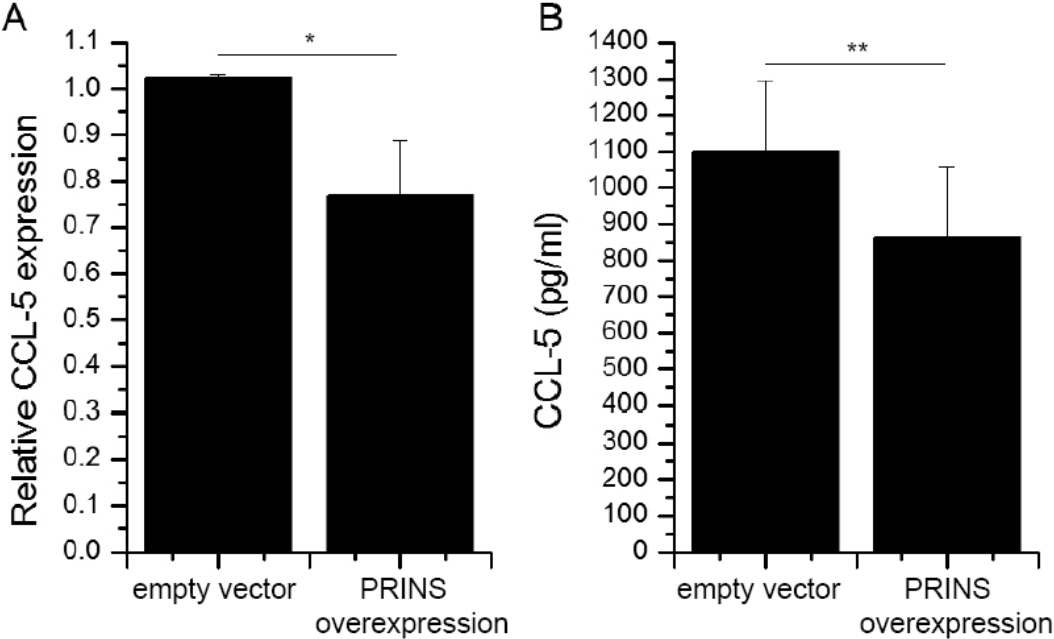

Supplement: data_sheet_1.pdf [file data_sheet_1.pdf]
